# Supplementary material
Source: PubMed Central journal article supplement (PMC3891674)
Supplement: NIHMS406408-supplement-148_2012_440_MOESM1_ESM.pdf [file NIHMS406408-supplement-148_2012_440_MOESM1_ESM.pdf]

**ONLINE APPENDIX FOR**  
**“HOW DO IMMIGRANTS SPEND THEIR TIME?**  
**THE PROCESS OF ASSIMILATION”**

**Appendix Table 1. Descriptive Statistics on Demographics, Immigrants and Natives, ATUS 2004-2008, Mean and Its Standard Error**

|                          | <b>Immigrants</b> | <b>Natives</b>  |
|--------------------------|-------------------|-----------------|
| Age                      | 40.62<br>(0.16)   | 44.56<br>(0.08) |
| Hispanic                 | 0.539             | 0.065           |
| Afr-American             | 0.077             | 0.124           |
| Married                  | 0.611             | 0.531           |
| Male                     | 0.501             | 0.481           |
| No. Children<br>under 18 | 0.828<br>(0.01)   | 0.491<br>(0.01) |
| Kids 0 to 2?             | 0.161             | 0.084           |
| Kids 3 to 5?             | 0.146             | 0.077           |
| Kids 6 to 12?            | 0.246             | 0.141           |
| Kids 13 to<br>17?        | 0.158             | 0.108           |
| EDUC=12                  | 0.241             | 0.313           |
| EDUC 13-15               | 0.163             | 0.263           |
| EDUC=16                  | 0.150             | 0.170           |
| EDUC>16                  | 0.101             | 0.088           |

**Appendix Table 2. Control Variables in the Probits and Truncated Regressions in Table 2**

| <b>Activity:</b>         | <b>Purchasing</b>   | <b>Education</b>    | <b>Work</b>         | <b>Assimilating</b> |
|--------------------------|---------------------|---------------------|---------------------|---------------------|
| <b>Probit Estimates</b>  |                     |                     |                     |                     |
| Age                      | 0.0031<br>(0.0009)  | -0.0117<br>(0.0004) | 0.0410<br>(0.0011)  | 0.0047<br>(0.0007)  |
| Age squared/100          | -0.0034<br>(0.0009) | 0.0096<br>(0.0001)  | -0.0526<br>(0.0012) | -0.0107<br>(0.0007) |
| Hispanic                 | 0.0109<br>(0.0094)  | -0.0093<br>(0.0031) | 0.0150<br>(0.0097)  | 0.0090<br>(0.0072)  |
| Afr-American             | -0.0228<br>(0.0082) | 0.0029<br>(0.0034)  | -0.0501<br>(0.0086) | -0.0497<br>(0.0069) |
| Married                  | 0.0017<br>(0.0057)  | -0.0011<br>(0.0028) | -0.0101<br>(0.0065) | 0.0081<br>(0.0049)  |
| Male                     | -0.0996<br>(0.0053) | -0.0166<br>(0.0022) | 0.1248<br>(0.0055)  | 0.0140<br>(0.0043)  |
| No. Children<br>under 18 | 0.0035<br>(0.0057)  | 0.0039<br>(0.0023)  | -0.0117<br>(0.0056) | 0.0001<br>(0.0049)  |
| Kids 0 to 2?             | -0.0003<br>(0.0094) | -0.0390<br>(0.0042) | -0.0502<br>(0.0095) | -0.0561<br>(0.0070) |
| Kids 3 to 5?             | -0.0091<br>(0.0105) | -0.0240<br>(0.0026) | -0.0277<br>(0.0103) | -0.0431<br>(0.0099) |
| Kids 6 to 12?            | 0.0083<br>(0.0102)  | -0.0145<br>(0.0037) | -0.0185<br>(0.0101) | -0.0086<br>(0.0088) |

|                |                    |                     |                    |                    |
|----------------|--------------------|---------------------|--------------------|--------------------|
| Kids 13 to 17? | 0.0199<br>(0.0099) | 0.0069<br>(0.0047)  | 0.0042<br>(0.0099) | 0.0228<br>(0.0081) |
| EDUC=12        | 0.0682<br>(0.0090) | -0.0310<br>(0.0026) | 0.1209<br>(0.0100) | 0.0529<br>(0.0064) |
| EDUC 13-15     | 0.1110<br>(0.0091) | 0.0041<br>(0.0033)  | 0.1555<br>(0.0100) | 0.0999<br>(0.0061) |
| EDUC=16        | 0.1424<br>(0.0098) | 0.0005<br>(0.0037)  | 0.2133<br>(0.0102) | 0.1355<br>(0.0055) |
| EDUC>16        | 0.1399<br>(0.0111) | 0.0413<br>(0.0047)  | 0.2736<br>(0.0107) | 0.1532<br>(0.0051) |

**Appendix Table 2, cont.****Truncated Regression Estimates:**

|                          |                    |                     |                    |                    |
|--------------------------|--------------------|---------------------|--------------------|--------------------|
| Age                      | 0.200<br>(0.187)   | -6.887<br>(1.492)   | 14.107<br>(0.564)  | 12.159<br>(0.388)  |
| Age squared/100          | 0.217<br>(0.002)   | 3.540<br>(1.674)    | -16.383<br>(0.649) | -17.077<br>(0.412) |
| Hispanic                 | 10.366<br>(1.932)  | 1.339<br>(8,484)    | 21.562<br>(4.406)  | 4.395<br>(3.780)   |
| Afr-American             | 5.968<br>(1.761)   | -13.540<br>(8.639)  | 5.870<br>(4.145)   | -10.653<br>(3.555) |
| Married                  | 9.764<br>(1.304)   | -5.754<br>(10.378)  | 5.381<br>(3.066)   | -0.836<br>(2.704)  |
| Male                     | -19.235<br>(1.092) | -2.639<br>(5.906)   | 56.55<br>(2.524)   | 65.607<br>(2.184)  |
| No. Children<br>under 18 | -3.270<br>(1.281)  | -19.588<br>(10.378) | -4.350<br>(2.873)  | -7.474<br>(2.592)  |
| Kids 0 to 2?             | 5.202<br>(2.104)   | 4.534<br>(15.900)   | 0.911<br>(4.803)   | -34.348<br>(4.238) |
| Kids 3 to 5?             | 2.813<br>(2.441)   | -2.194<br>(20.583)  | -0.327<br>(5.341)  | -16.93<br>(4.899)  |
| Kids 6 to 12?            | -0.998<br>(2.373)  | 2.615<br>(18.925)   | -11.723<br>(5.196) | -20.601<br>(4.765) |
| Kids 13 to 17?           | 4.234<br>(2.338)   | 46.104<br>(20.522)  | 5.752<br>(5.083)   | 4.925<br>(7.178)   |
| EDUC=12                  | -2.413<br>(1.847)  | -81.676<br>(11.149) | 33.208<br>(4.589)  | 14.668<br>(3.679)  |

|            |                   |                     |                   |                   |
|------------|-------------------|---------------------|-------------------|-------------------|
| EDUC 13-15 | -0.286<br>(1.873) | -36.546<br>(9.100)  | 21.346<br>(4.664) | 25.156<br>(3.730) |
| EDUC=16    | -6.608<br>(2.047) | -36.122<br>(13.012) | 17.955<br>(4.943) | 31.366<br>(4.107) |
| EDUC>16    | -5.129<br>(2.387) | -56.96<br>(17.810)  | 7.284<br>(0.0107) | 43.516<br>(4.808) |
